# Supplementary material for: Combining Molecular Docking and Molecular Dynamics to Predict the Binding Modes of Flavonoid Derivatives with the Neuraminidase of the 2009 H1N1 Influenza A Virus
Source: MDPI journal article supplement (doi:10.3390/ijms13044496), 2012-04-10

# Supplementary Materials

**Table S1.** 20 flavonoids derivatives inhibitors of the 2009 H1N1 neuraminidase.

| Inhibitors<br>Hydrophilic (blue color) and hydrophobic (red color)<br>parts for SIE and RDF calculations | Experimental<br>Binding free energy $\Delta G_b^{Exp}$<br>(kcal/mol) and Experimental IC <sub>50</sub><br>(mM) |
|----------------------------------------------------------------------------------------------------------|----------------------------------------------------------------------------------------------------------------|
| <b>1:</b> (2Z)-6-hydroxy-2-[(4-hydroxyphenyl)methylene]benzofuran-3-one                                  |                                                                                                                |
| 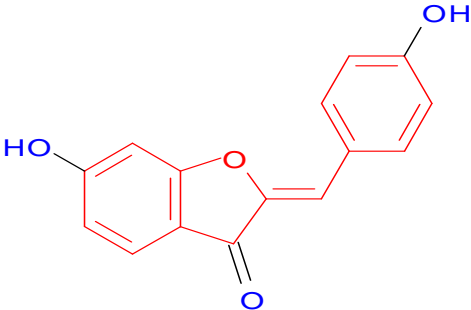                        | -7.002<br>(0.00559)                                                                                            |
| <b>2:</b> (2Z)-4,6-dihydroxy-2-[(4-hydroxyphenyl)methylene]benzofuran-3-one                              |                                                                                                                |
|                        | -6.714<br>(0.00692)                                                                                            |
| <b>3:</b> (2Z)-2-[(3,4-dihydroxyphenyl)methylene]-6-hydroxy-benzofuran-3-one                             |                                                                                                                |
|                       | -6.518<br>(0.00800)                                                                                            |

Table S1. Cont.

| Inhibitors<br>Hydrophilic (blue color) and hydrophobic (red color)<br>parts for SIE and RDF calculations | Experimental<br>Binding free energy $\Delta G_b^{Exp}$ (kcal/mol)<br>and Experimental IC <sub>50</sub> (mM) |
|----------------------------------------------------------------------------------------------------------|-------------------------------------------------------------------------------------------------------------|
| <b>4:</b> 5,7-dihydroxy-2-(4-hydroxyphenyl)chromen-4-one                                                 |                                                                                                             |
| 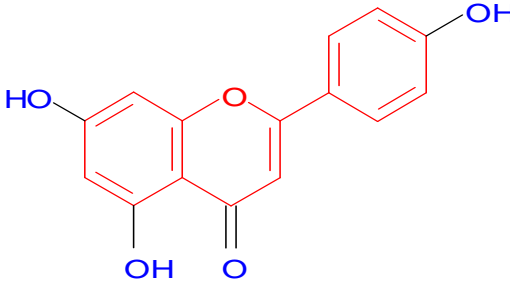                        | -6.430<br>(0.00854)                                                                                         |
| <b>5:</b> 7-hydroxy-3-(4-hydroxyphenyl)chromen-4-one                                                     |                                                                                                             |
|                        | -6.296<br>(0.00943)                                                                                         |
| <b>6:</b> 2-(3,4-dihydroxyphenyl)-5,7-dihydroxy-chromen-4-one                                            |                                                                                                             |
|                       | -6.265<br>(0.00965)                                                                                         |
| <b>7:</b> 5,7-dihydroxy-2-phenyl-chromen-4-one                                                           |                                                                                                             |
|                       | -6.014<br>(0.01162)                                                                                         |

Table S1. Cont.

| Inhibitors                                                                              | Experimental                                                                             |
|-----------------------------------------------------------------------------------------|------------------------------------------------------------------------------------------|
| Hydrophilic (blue color) and hydrophobic (red color) parts for SIE and RDF calculations | Binding free energy $\Delta G_b^{Exp}$ (kcal/mol) and Experimental IC <sub>50</sub> (mM) |
| <b>8:</b> 5,7-dihydroxy-2-(4-hydroxyphenyl)-8-methoxy-chromen-4-one                     |                                                                                          |
| 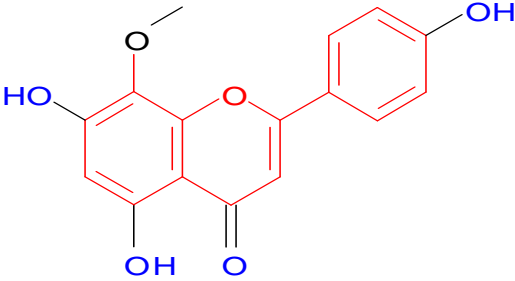       | -5.847<br>(0.01315)                                                                      |
| <b>9:</b> 5,7-dihydroxy-2-(4-hydroxyphenyl)-6-methoxy-chromen-4-one                     |                                                                                          |
|       | -5.773<br>(0.01390)                                                                      |
| <b>10:</b> 5,6,7-trihydroxy-2-(4-hydroxyphenyl)chromen-4-one                            |                                                                                          |
|      | -5.717<br>(0.01448)                                                                      |
| <b>11:</b> 5,6,7-trihydroxy-2-(4-hydroxyphenyl)chromen-4-one                            |                                                                                          |
|      | -5.629<br>(0.01546)                                                                      |

Table S1. Cont.

| Inhibitors                                                                              | Experimental                                                                             |
|-----------------------------------------------------------------------------------------|------------------------------------------------------------------------------------------|
| Hydrophilic (blue color) and hydrophobic (red color) parts for SIE and RDF calculations | Binding free energy $\Delta G_b^{Exp}$ (kcal/mol) and Experimental IC <sub>50</sub> (mM) |
| <b>12:</b> [5-hydroxy-2-(3,4,5-trihydroxyphenyl)chroman-7-yl] 3,4,5-trihydroxybenzoate  |                                                                                          |
|                                                                                         | -5.608<br>(0.15700)                                                                      |
| <b>13:</b> 3,5,7-trihydroxy-2-(4-hydroxyphenyl)chromen-4-one                            |                                                                                          |
|                                                                                         | -5.519<br>(0.01677)                                                                      |
| <b>14:</b> (2E)-2-benzylidene-6-hydroxy-benzofuran-3-one                                |                                                                                          |
|                                                                                         | -5.489<br>(0.01715)                                                                      |
| <b>15:</b> 2-(3,4-dihydroxyphenyl)-3,5,7-trihydroxy-chromen-4-one                       |                                                                                          |
|                                                                                         | -5.450<br>(0.01765)                                                                      |

Table S1. Cont.

| Inhibitors                                                                                                                                                                                                 | Experimental                                                                                |
|------------------------------------------------------------------------------------------------------------------------------------------------------------------------------------------------------------|---------------------------------------------------------------------------------------------|
| Hydrophilic (blue color) and hydrophobic (red color)<br>parts for SIE and RDF calculations                                                                                                                 | Binding free energy $\Delta G_b^{Exp}$ (kcal/mol)<br>and Experimental IC <sub>50</sub> (mM) |
| <b>16:</b> 5-acetamido-4-hydroxy-2-[5-hydroxy-6-[4-(5-hydroxy-7-methoxy-4-oxo-chromen-2-yl)phenoxy]-2-(4-methoxyphenyl)-4-oxo-chromen-7-yl]oxy-6-(1,2,3-trihydroxypropyl)tetrahydropyran-2-carboxylic acid | -5.343<br>(0.01910)                                                                         |
|                                                                                                                                                                                                            |                                                                                             |
| <b>17:</b> 5,7-dihydroxy-3-(4-hydroxyphenyl)chromen-4-one                                                                                                                                                  | -5.226<br>(0.02084)                                                                         |
|                                                                                                                                                                                                            |                                                                                             |

Table S1. Cont.

| Inhibitors<br>Hydrophilic (blue color) and hydrophobic (red color)<br>parts for SIE and RDF calculations                 | Experimental<br>Binding free energy $\Delta G_b^{Exp}$ (kcal/mol)<br>and Experimental IC <sub>50</sub> (mM) |
|--------------------------------------------------------------------------------------------------------------------------|-------------------------------------------------------------------------------------------------------------|
| <b>18:</b> 5,7-dihydroxy-2-(4-hydroxyphenyl)-8-[3,4,5-trihydroxy-6-(hydroxymethyl)tetrahydropyran-2-yl]chromen-4-one     | -5.450<br>(0.02085)                                                                                         |
| 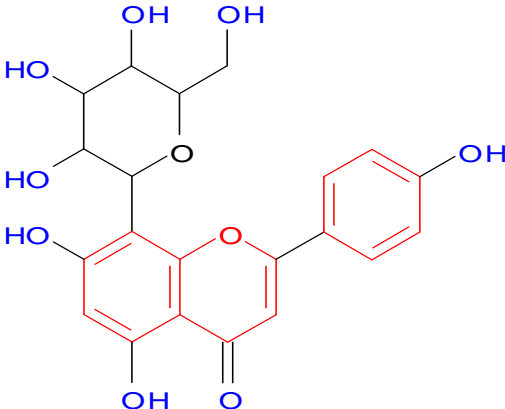                                        |                                                                                                             |
| <b>19:</b> 2-(3,4-dihydroxyphenyl)-5-hydroxy-7-[3,4,5-trihydroxy-6-(hydroxymethyl)tetrahydropyran-2-yl]oxy-chromen-4-one | -5.163<br>(0.02125)                                                                                         |
|                                       |                                                                                                             |

Table S1. Cont.

| Inhibitors                                                                                                                                                        | Experimental                                      |
|-------------------------------------------------------------------------------------------------------------------------------------------------------------------|---------------------------------------------------|
| Hydrophilic (blue color) and hydrophobic (red color)                                                                                                              | Binding free energy $\Delta G_b^{Exp}$ (kcal/mol) |
| parts for SIE and RDF calculations                                                                                                                                | and Experimental IC <sub>50</sub> (mM)            |
| <b>20:</b> 3-[4,5-dihydroxy-6-(hydroxymethyl)-3-(3,4,5-trihydroxytetrahydropyran-2-yl)oxy-tetrahydropyran-2-yl]oxy-5,7-dihydroxy-2-(4-hydroxyphenyl)chromen-4-one |                                                   |
| 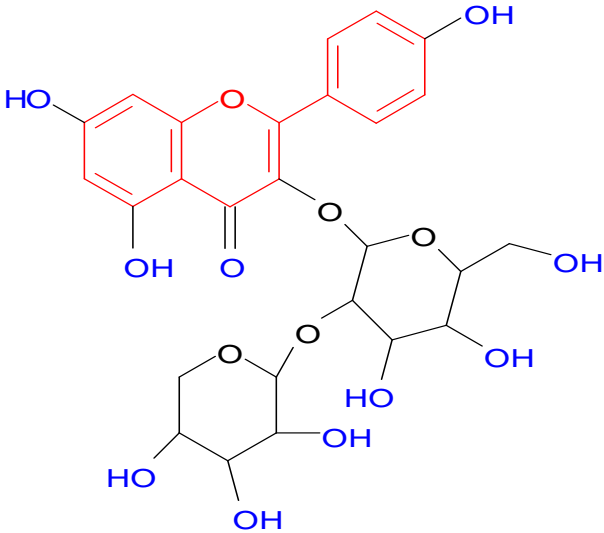                                                                                | -5.084<br>(0.02450)                               |

**Table S2.** Binding free energies analysis of hydrophobic natures of 20 flavonoids/hydrophobic natures of the important residue regions analyzed by the ligplot program (kcal/mol).

[illegible]



**Table S3.** Binding free energies analysis of hydrophilic nature of 20 flavonoids/hydrophilic nature of natures of the important residue regions analyzed by the ligplot program (kcal/mol).

| Inhibitor | 1      | 2      | 3      | 4      | 5      | 6      | 7      | 8      | 9      | 10      | 11     | 12     | 13     | 14      | 15     | 16     | 17     | 18     | 19     | 20     |
|-----------|--------|--------|--------|--------|--------|--------|--------|--------|--------|---------|--------|--------|--------|---------|--------|--------|--------|--------|--------|--------|
| Arg152    | -0.56  | -0.722 | -0.507 | -1.334 | -0.154 | -1.896 | -1.11  | -1.506 | -0.868 | -1.248  | -1.587 | -1.624 | -1.761 | -0.72   | -1.105 | -1.561 | -0.601 | -2.252 | -2.409 | -2.733 |
| Asn295    | -0.378 | -0.46  | -0.185 | -0.172 | -0.012 | -0.514 | -0.768 | -0.524 | -0.426 | -0.506  | -0.885 | -2.247 | -1.239 | -0.538  | -1.534 | -1.321 | -0.649 | -1.871 | -2.169 | -2.333 |
| Asn325    | -0.174 | -0.19  | -0.082 | -0.25  | 0.054  | -0.134 | -0.086 | -0.214 | -0.1   | -0.15   | -0.302 | -0.61  | -0.254 | -0.166  | -0.294 | -0.794 | -0.234 | -0.502 | -0.814 | -0.846 |
| Asn344    | -0.199 | -0.255 | 0.073  | -0.515 | -0.125 | -0.359 | -0.191 | -0.239 | -0.034 | -0.355  | -0.487 | -0.988 | -0.419 | -0.011  | -0.619 | -0.803 | -0.044 | -0.965 | -0.756 | -0.868 |
| Asp151    | -0.031 | -0.065 | -0.073 | -0.43  | -0.034 | -0.546 | -0.144 | -0.316 | -0.202 | -0.55   | -0.473 | -0.765 | -0.171 | -0.034  | -0.286 | -1.636 | -0.196 | -0.458 | -0.621 | -0.689 |
| Asp295    | -0.546 | -0.556 | -0.176 | -0.281 | 0.059  | -0.021 | -0.491 | -0.071 | -0.292 | -0.001  | -0.096 | -0.649 | -0.566 | -0.361  | -0.621 | -1.571 | -0.371 | -0.404 | -0.599 | -0.619 |
| Glu119    | -0.138 | -0.196 | -0.292 | -0.901 | -0.049 | -0.993 | -0.119 | -0.883 | -0.145 | -0.391  | -0.542 | -1.446 | -0.187 | -0.128  | -0.362 | -1.377 | -0.017 | -1.012 | -1.442 | -1.558 |
| Glu228    | -0.04  | -0.086 | -0.138 | -0.621 | 0.003  | -0.725 | -0.087 | -0.555 | -0.129 | -0.741  | -0.778 | -1.326 | -0.24  | -0.037  | -0.385 | -1.119 | -0.06  | -0.948 | -1.144 | -1.236 |
| Glu277    | -0.142 | -0.176 | -0.184 | -0.541 | -0.145 | -0.657 | -0.255 | -0.427 | -0.313 | -0.661  | -0.584 | -1.176 | -0.282 | -0.145  | -0.397 | -1.332 | 0.108  | -0.654 | -1.317 | -1.385 |
| Ser180    | -0.044 | -0.066 | -0.03  | -0.261 | -0.093 | -0.389 | -0.223 | -0.099 | -0.297 | -0.381  | -0.19  | -0.826 | -0.124 | -0.053  | -0.209 | -0.859 | -0.139 | -0.375 | -0.804 | -0.848 |
| Ser247    | -0.098 | -0.11  | -0.154 | -0.28  | -0.052 | -0.268 | -0.032 | -0.328 | -0.016 | -0.28   | -0.394 | -0.75  | -0.158 | -0.092  | -0.188 | -0.888 | -0.168 | -0.694 | -0.928 | -0.952 |
| Ser366    | -0.319 | -0.325 | -0.097 | -0.16  | 0.104  | -0.004 | -0.286 | -0.034 | 0.152  | 0.02    | -0.037 | -0.815 | -0.319 | -0.136  | -0.364 | -0.814 | -0.154 | -0.622 | -0.739 | -0.751 |
| Ser367    | -0.227 | -0.231 | -0.079 | -0.121 | -0.045 | -0.017 | -0.205 | -0.037 | 0.067  | -0.021  | -0.059 | -0.711 | -0.247 | -0.225  | -0.257 | -0.757 | -0.217 | -0.659 | -0.737 | -0.745 |
| Thr226    | -0.292 | -0.294 | -0.218 | -0.239 | -0.051 | -0.187 | -0.281 | -0.197 | -0.115 | -0.159  | -0.178 | -0.804 | -0.272 | -0.111  | -0.307 | -0.857 | -0.137 | -0.763 | -0.802 | -0.806 |
| Trp179    | 0      | 0      | 0      | 0      | 0      | 0      | 0      | 0      | 0      | 0       | 0      | 0      | 0      | 0       | 0      | 0      | 0      | 0      | 0      | 0      |
| Tyr402    | -0.352 | -0.354 | -0.278 | -0.299 | -0.111 | -0.247 | -0.341 | -0.257 | -0.235 | -0.279  | -0.298 | -0.824 | -0.392 | -0.231  | -0.367 | -0.917 | -0.197 | -0.913 | -0.952 | -0.956 |
| Val346    | 0      | 0      | 0      | 0      | 0      | 0      | 0      | 0      | 0      | 0       | 0      | 0      | 0      | 0       | 0      | 0      | 0      | 0      | 0      | 0      |
| Tip3      | -0.614 | -0.685 | -0.603 | -0.689 | -0.645 | -0.879 | -0.513 | -0.613 | -0.615 | -0.7606 | -0.654 | -2.577 | -0.516 | -0.2261 | -0.878 | -1.861 | -0.135 | -1.824 | -1.713 | -1.864 |

**Table S4.** Hydrophilic and hydrophobic natures of the important residue regions analyzed by the ligplot program.

| The important residue regions analyzed by the ligplot program | Hydrophilic (blue color) and hydrophobic (red color) parts for SIE and RDF calculation |
|---------------------------------------------------------------|----------------------------------------------------------------------------------------|
| Arg152                                                        | 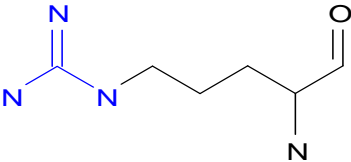     |
| Asn295, Asn325 and Asn344                                     |     |
| Asp151 and Asp295,                                            |    |
| Glu119, Glu228 and Glu277,                                    |   |
| Ser180, Ser247, Ser366 and Ser367,                            |   |
| Thr226                                                        |   |
| Trp179                                                        |    |
| Tyr402                                                        |    |

Table S4. Cont.

| The important residue regions analyzed by the ligplot program | Hydrophilic (blue color) and hydrophobic (red color) parts for SIE and RDF calculation |
|---------------------------------------------------------------|----------------------------------------------------------------------------------------|
| Val346                                                        | 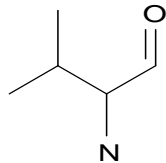    |

**Figure S1.** (A) Pharmacophore of Inhibitor 1; (B) Inhibitor 1 bound to the binding site of the 2009 H1N1 neuraminidase.

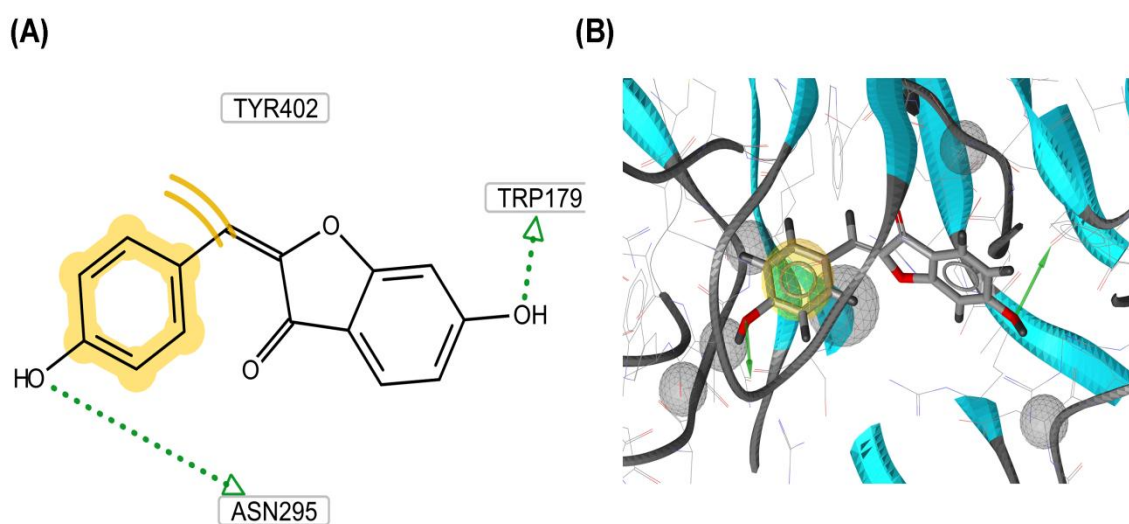

**Figure S2.** (A) Pharmacophore of Inhibitor 2; (B) Inhibitor 2 bound to the binding site of the 2009 H1N1 neuraminidase.

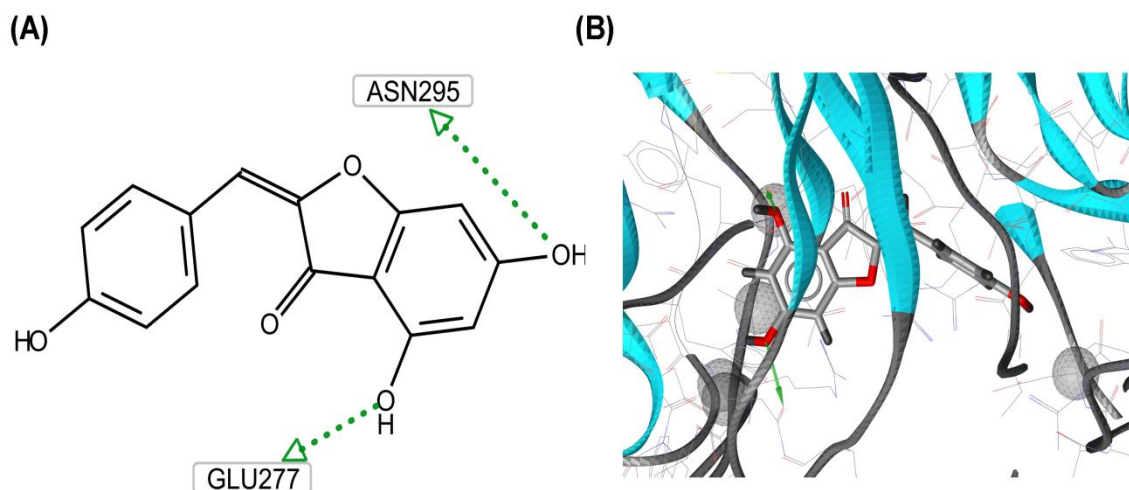

**Figure S3.** (A) Pharmacophore of Inhibitor 3; (B) Inhibitor 3 bound to the binding site of the 2009 H1N1 neuraminidase.

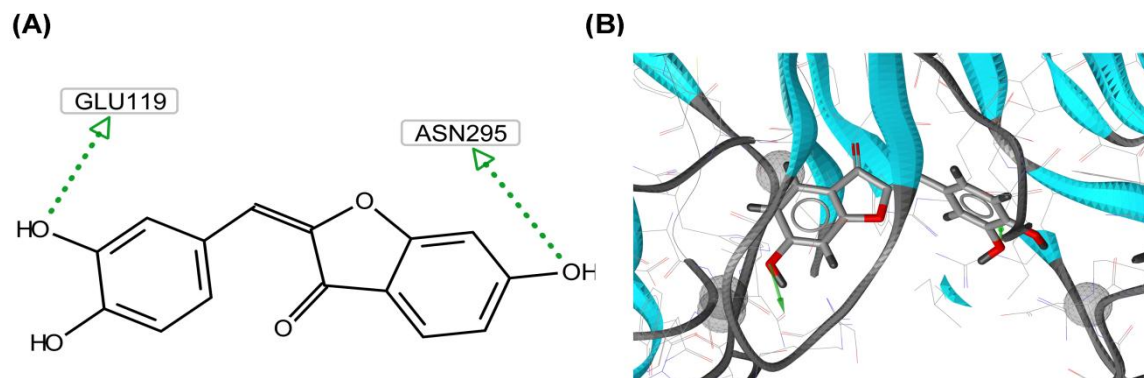

**Figure S4.** (A) Pharmacophore of Inhibitor 4; (B) Inhibitor 4 bound to the binding site of the 2009 H1N1 neuraminidase.

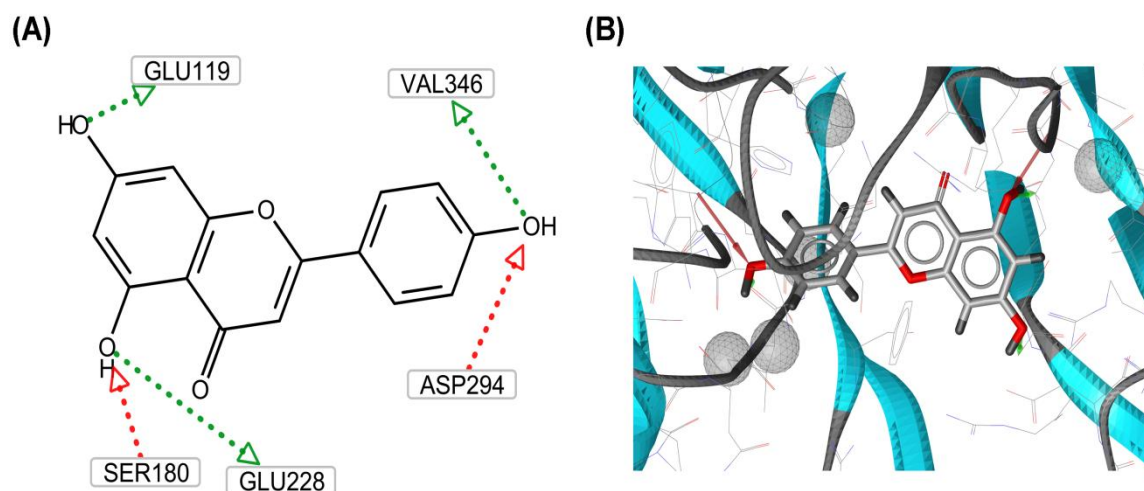

**Figure S5.** (A) Pharmacophore of Inhibitor 5; (B) Inhibitor 5 bound to the binding site of the 2009 H1N1 neuraminidase.

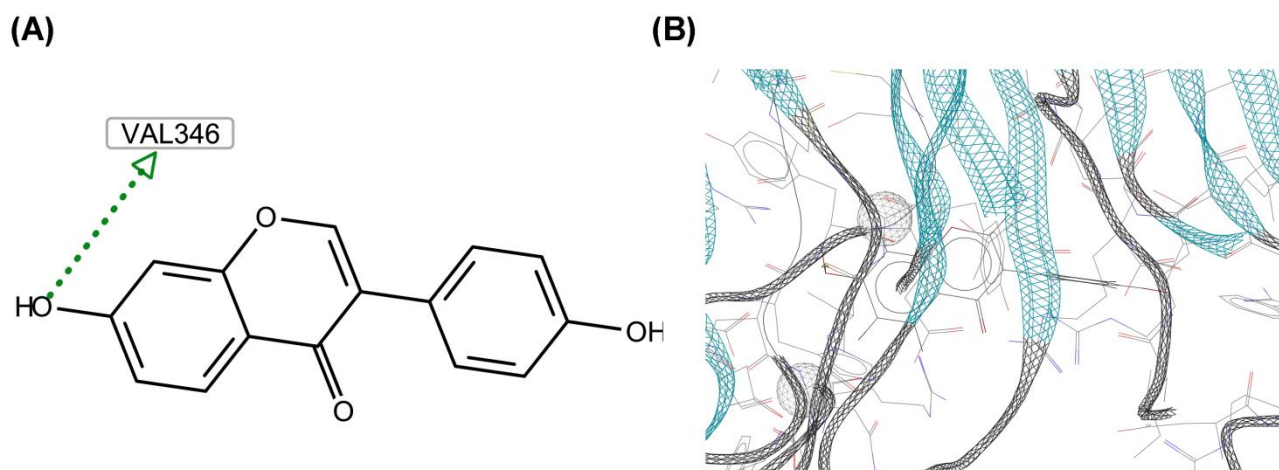

**Figure S6.** (A) Pharmacophore of Inhibitor 6; (B) Inhibitor 6 bound to the binding site of the 2009 H1N1 neuraminidase.

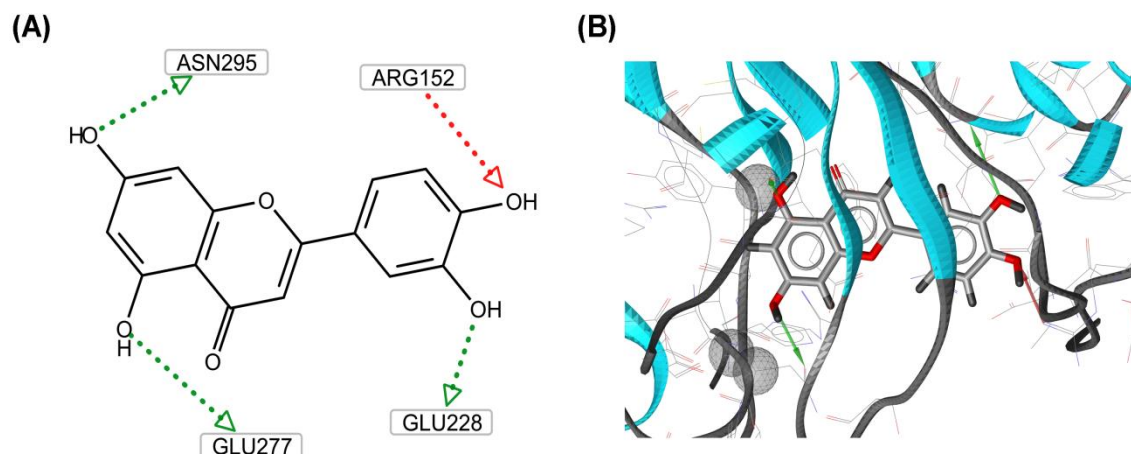

**Figure S7.** (A) Pharmacophore of Inhibitor 7; (B) Inhibitor 7 bound to the binding site of the 2009 H1N1 neuraminidase.

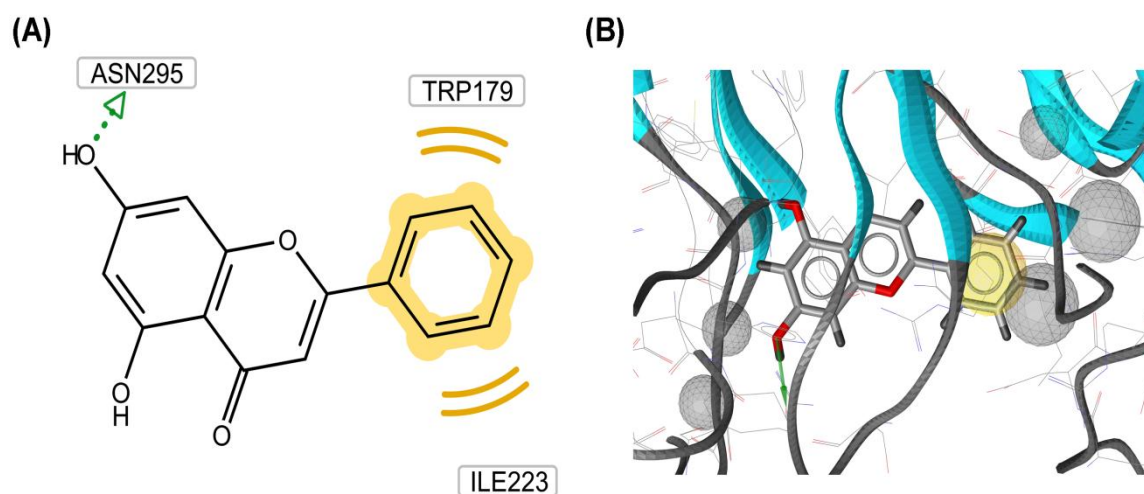

**Figure S8.** (A) Pharmacophore of Inhibitor 8; (B) Inhibitor 8 bound to the binding site of the 2009 H1N1 neuraminidase.

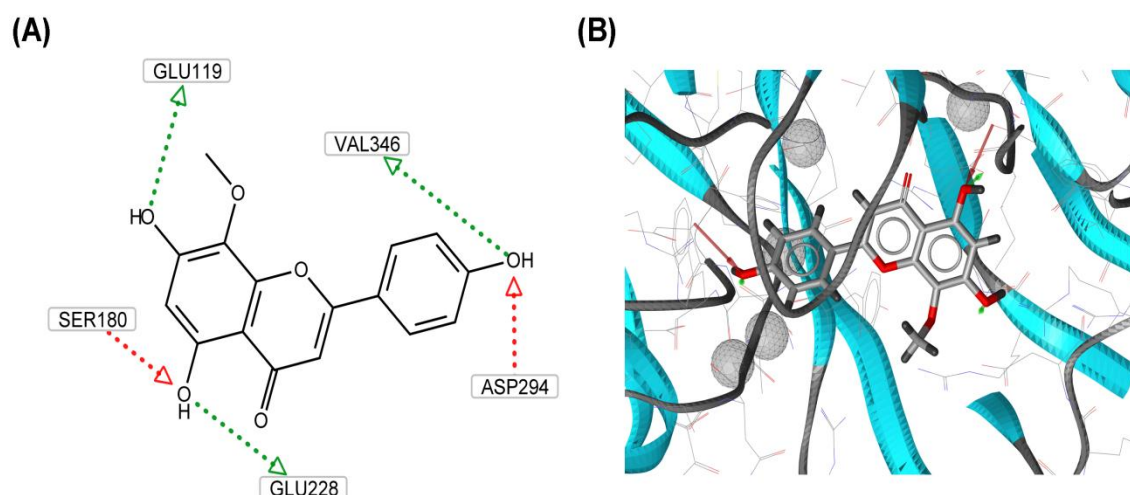



**Figure S9.** (A) Pharmacophore of Inhibitor 9; (B) Inhibitor 9 bound to the binding site of the 2009 H1N1 neuraminidase.

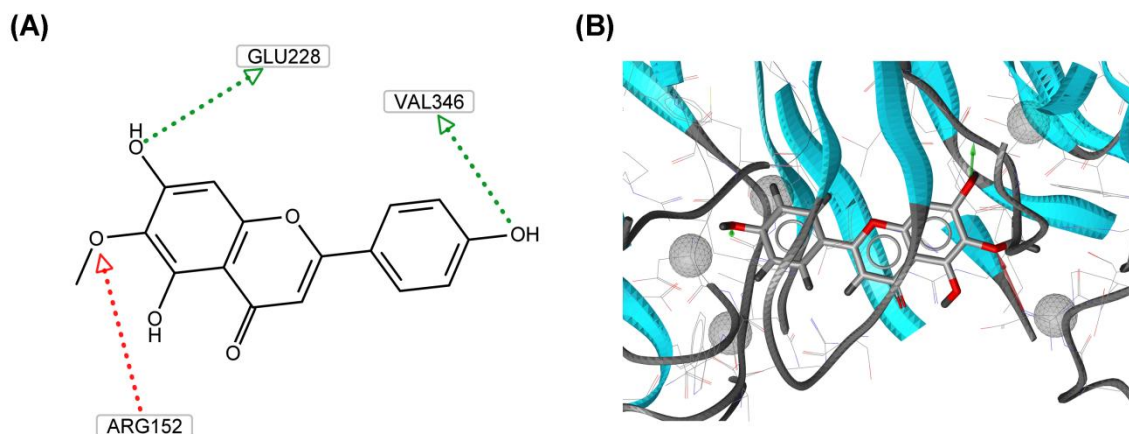

**Figure S10.** (A) Pharmacophore of Inhibitor 10; (B) Inhibitor 10 bound to the binding site of the 2009 H1N1 neuraminidase.

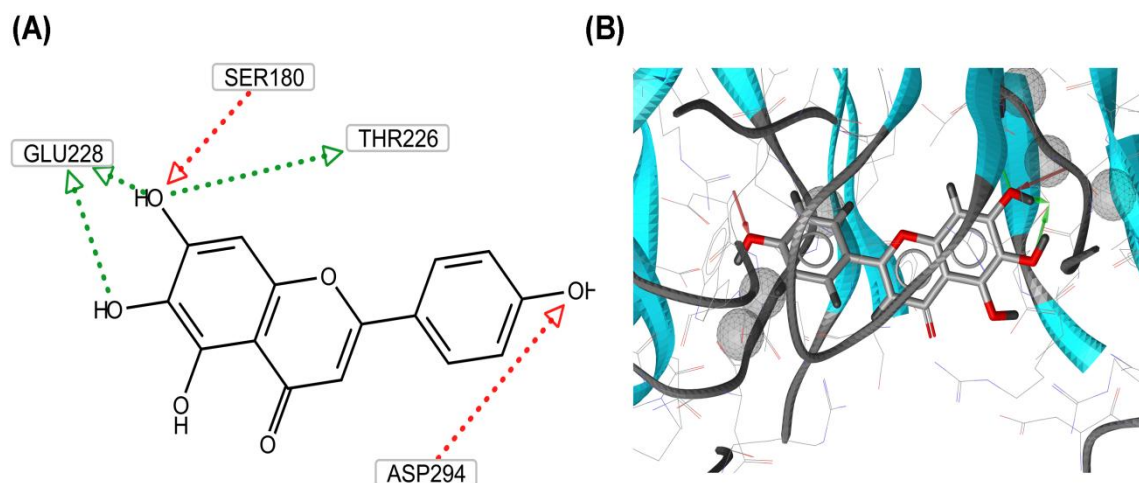

**Figure S11.** (A) Pharmacophore of Inhibitor 11; (B) Inhibitor 11 bound to the binding site of the 2009 H1N1 neuraminidase.

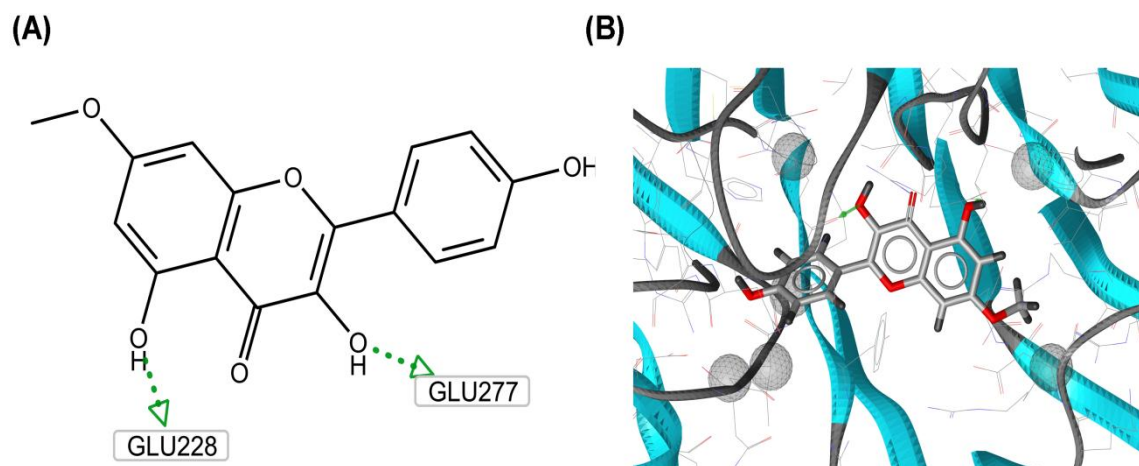

**Figure S12.** (A) Pharmacophore of Inhibitor 12; (B) Inhibitor 12 bound to the binding site of the 2009 H1N1 neuraminidase.

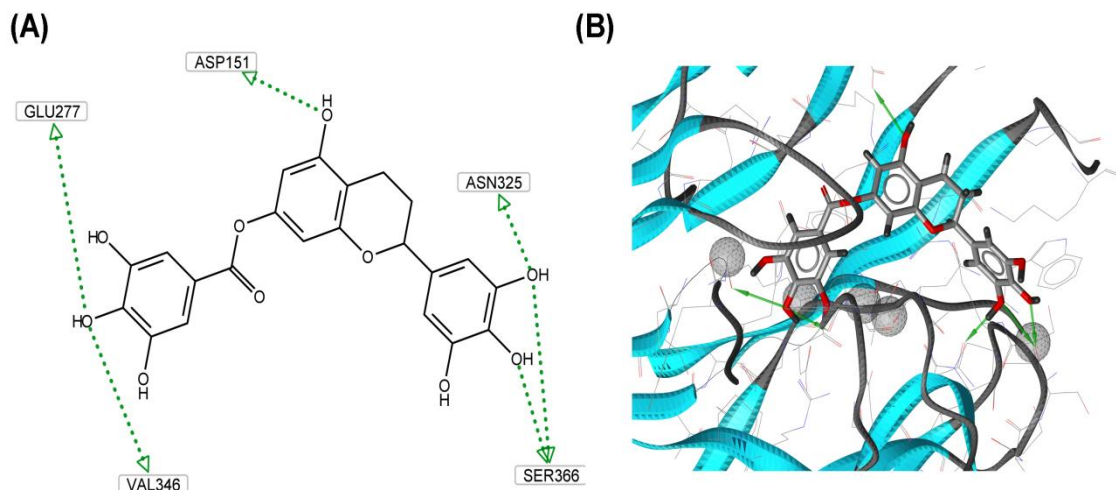

**Figure S13.** (A) Pharmacophore of Inhibitor 13; (B) Inhibitor 13 bound to the binding site of the 2009 H1N1 neuraminidase.

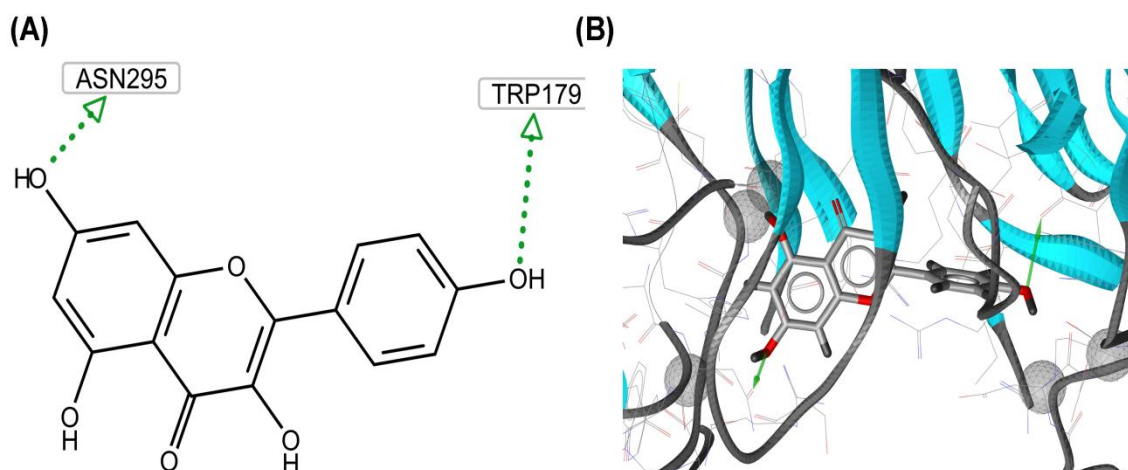

**Figure S14.** (A) Pharmacophore of Inhibitor 14; (B) Inhibitor 14 bound to the binding site of the 2009 H1N1 neuraminidase.

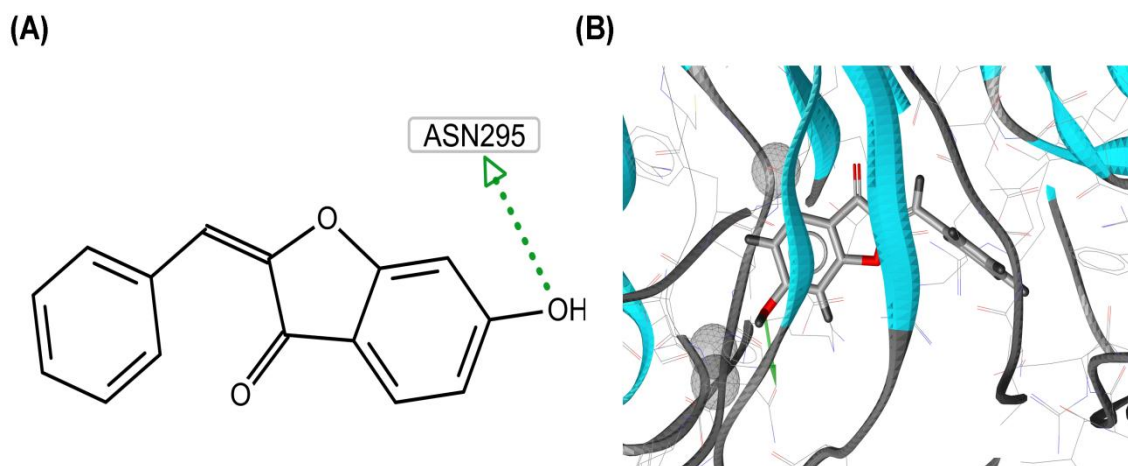

**Figure S15.** (A) Pharmacophore of Inhibitor 15; (B) Inhibitor 15 bound to the binding site of the 2009 H1N1 neuraminidase.

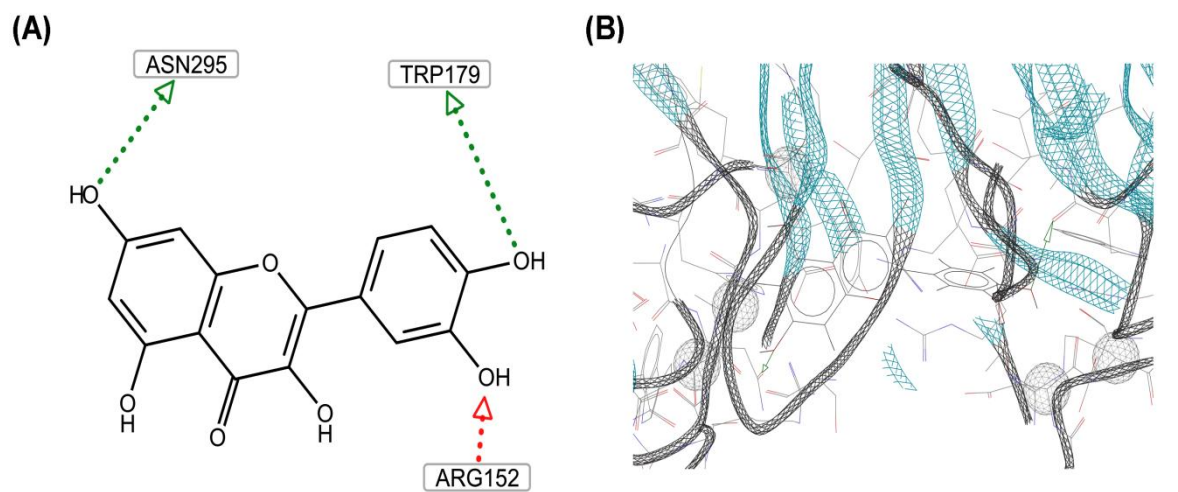

**Figure S16.** (A) Pharmacophore of Inhibitor 16; (B) Inhibitor 16 bound to the binding site of the 2009 H1N1 neuraminidase.

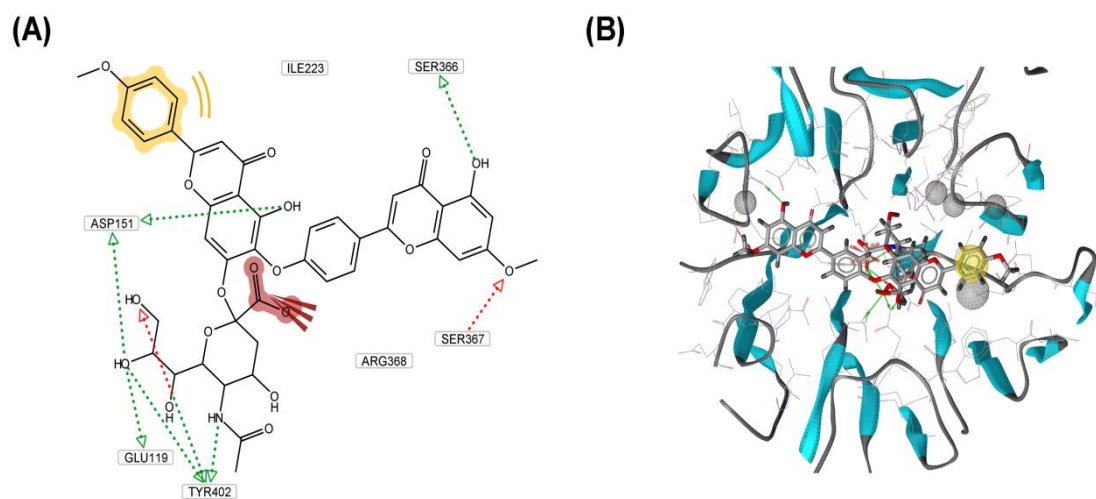

**Figure S17.** (A) Pharmacophore of Inhibitor 17; (B) Inhibitor 17 bound to the binding site of the 2009 H1N1 neuraminidase.

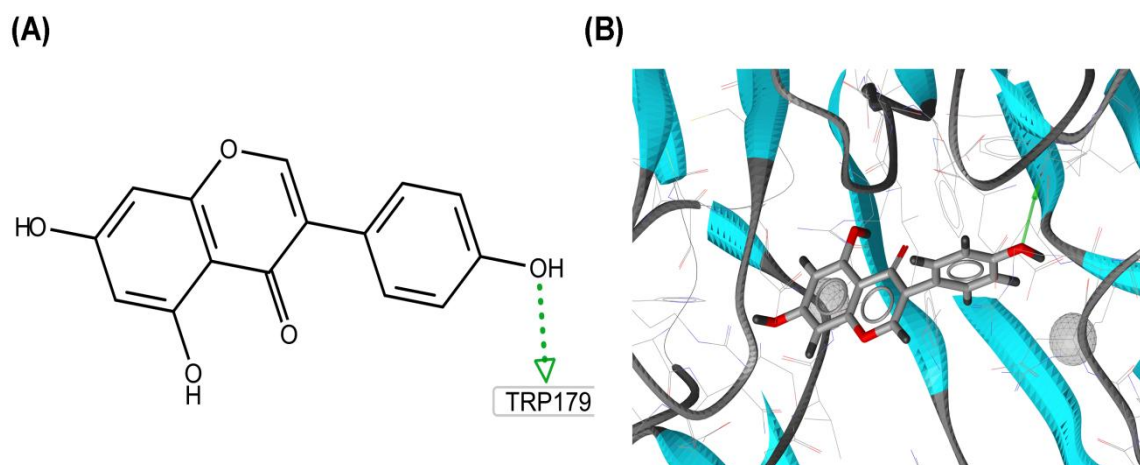



**Figure S18.** (A) Pharmacophore of Inhibitor 18; (B) Inhibitor 18 bound to the binding site of the 2009 H1N1 neuraminidase.

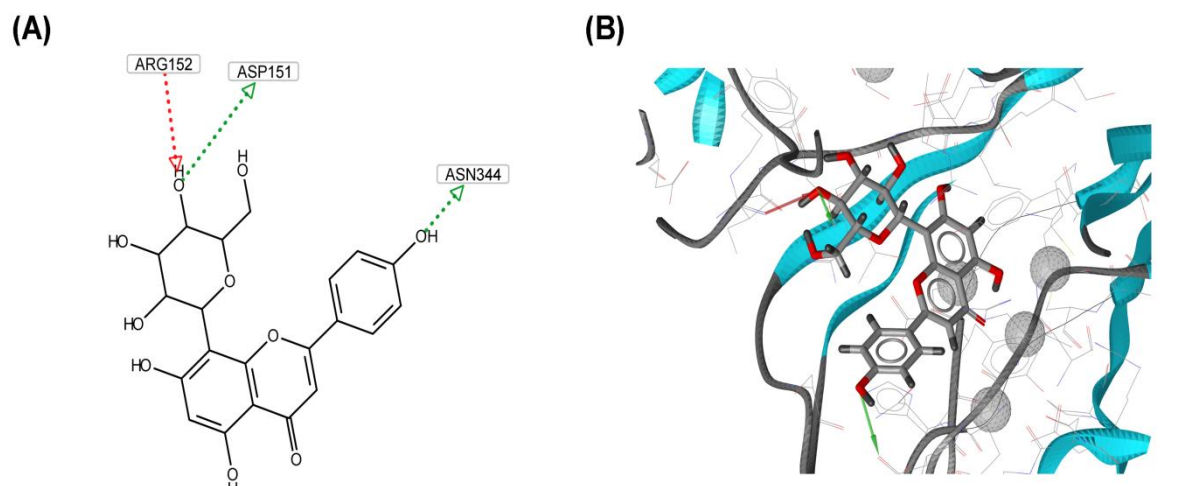

**Figure S19.** (A) Pharmacophore of Inhibitor 19; (B) Inhibitor 19 bound to the binding site of the 2009 H1N1 neuraminidase.

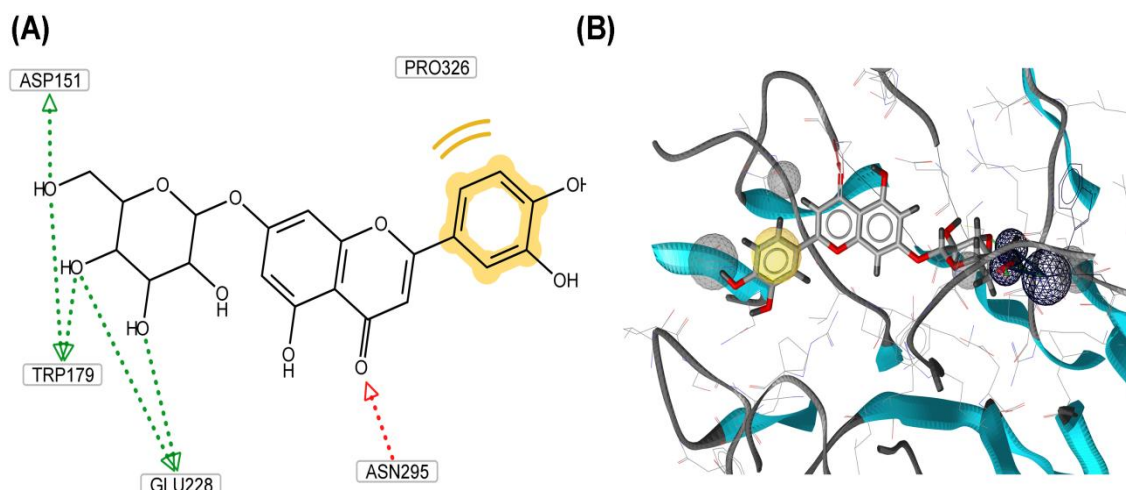

**Figure S20.** (A) Pharmacophore of Inhibitor 20; (B) Inhibitor 20 bound to the binding site of the 2009 H1N1 neuraminidase.

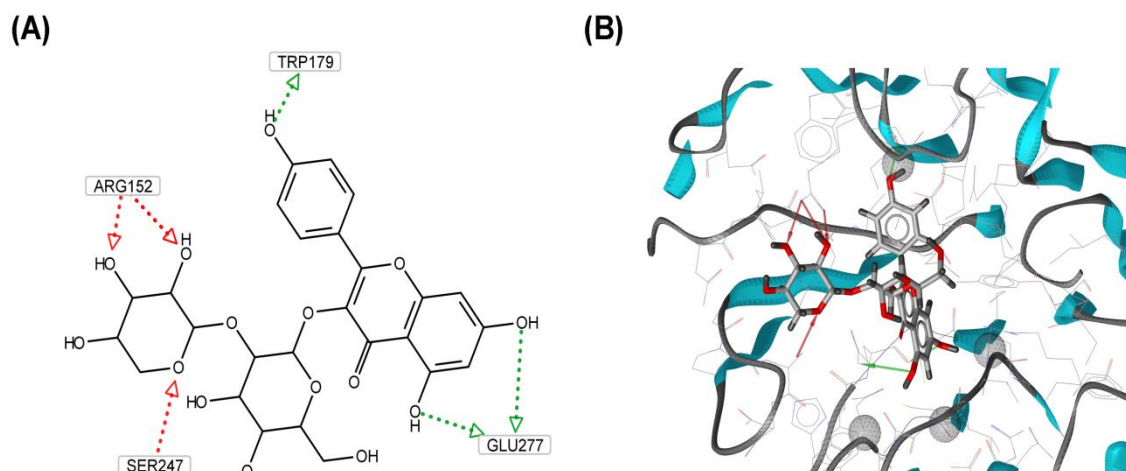



**Figure S22.** Binding free energies analysis of hydrophilic ( $-\text{OH}$ ,  $=\text{O}$ ,  $-\text{NH}_2$  and  $=\text{NH}$  functional groups) nature of 20 flavonoids/hydrophilic nature of natures of the important residue regions analyzed by the ligplot program (kcal/mol).

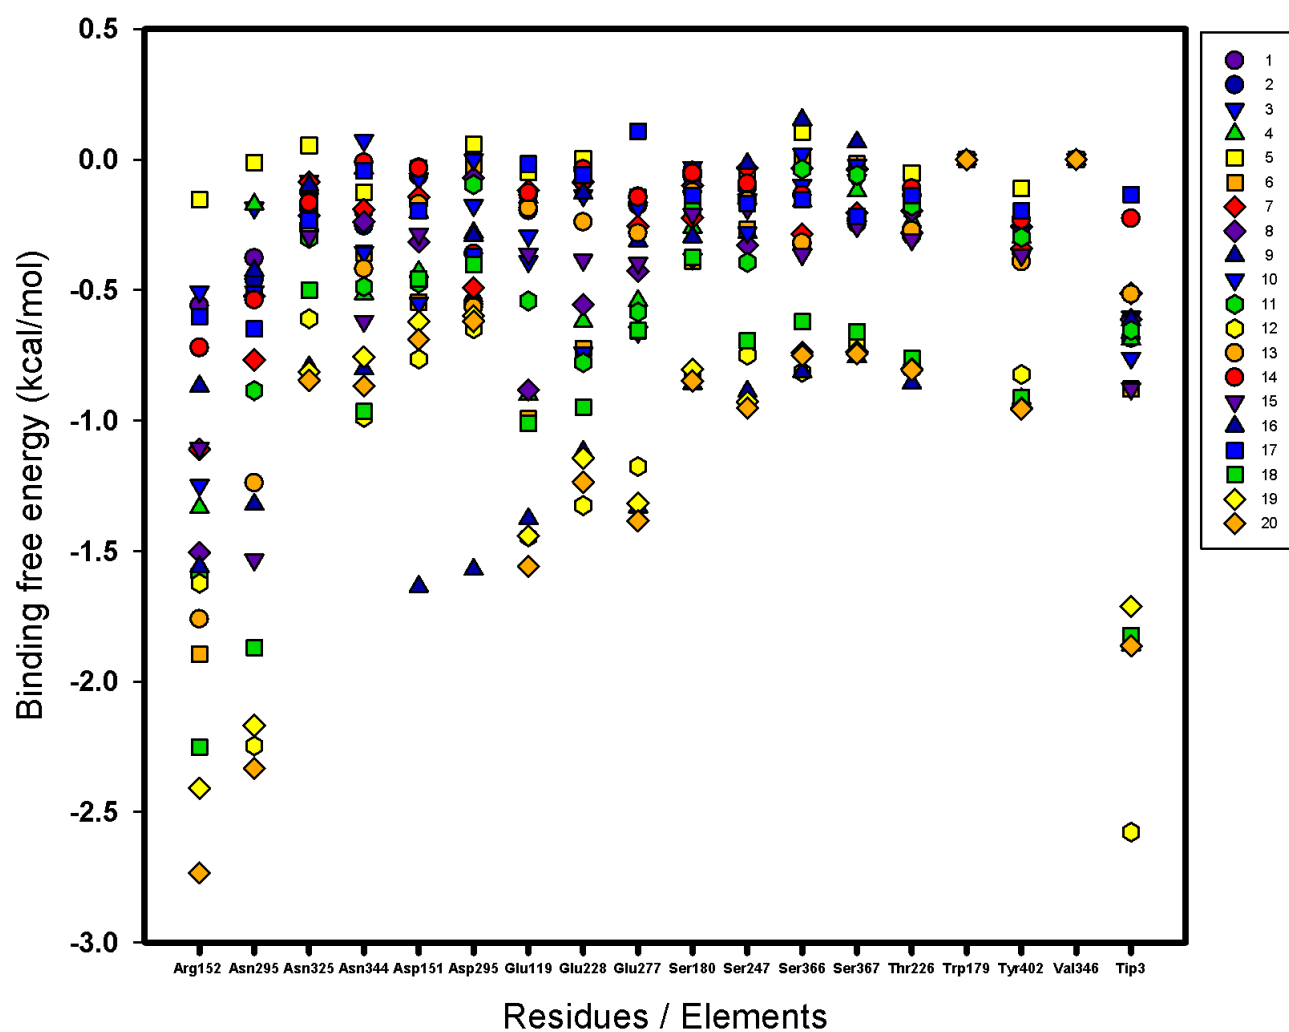

**Figure S23.** Correlation between binding free energies of Tip3 water molecules, and number of –OH and =O functional group of inhibitors.

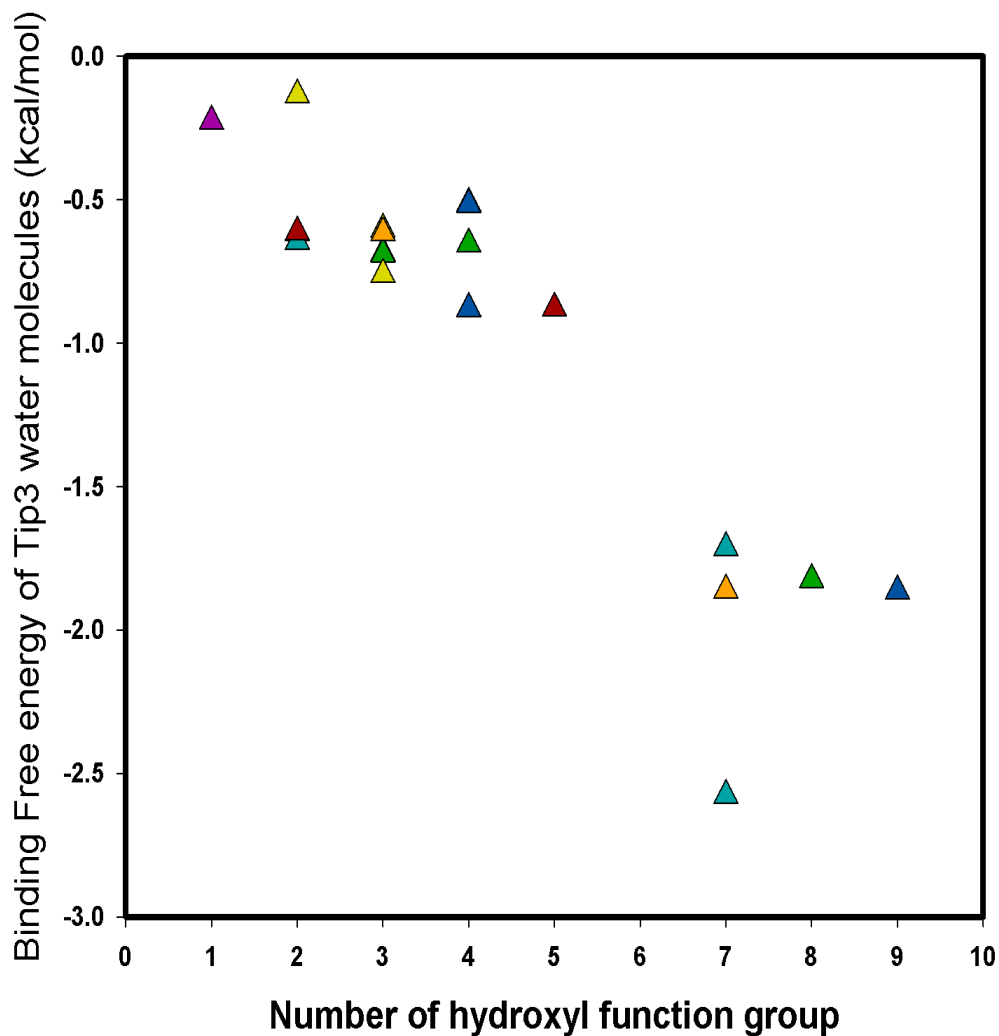

Supplement: s1 [file s1]
